# Supplementary material for: Silencing of Long Non-coding RNA HOTTIP Reduces Inflammation in Rheumatoid Arthritis by Demethylation of SFRP1
Source: PubMed Central journal article supplement (PMC6948255; doi:10.1016/j.omtn.2019.11.015), 2019-11-26
Supplement: mmc1.pdf [file mmc1.pdf]

OMTN, Volume 19

## **Supplemental Information**

### **Silencing of Long Non-coding RNA HOTTIP**

#### **Reduces Inflammation in Rheumatoid**

#### **Arthritis by Demethylation of SFRP1**

**Xumin Hu, Jianhua Tang, Xuyun Hu, Peng Bao, Weixi Deng, Jionglin Wu, Yuwei Liang, Zhipeng Chen, Liangbin Gao, and Yong Tang**

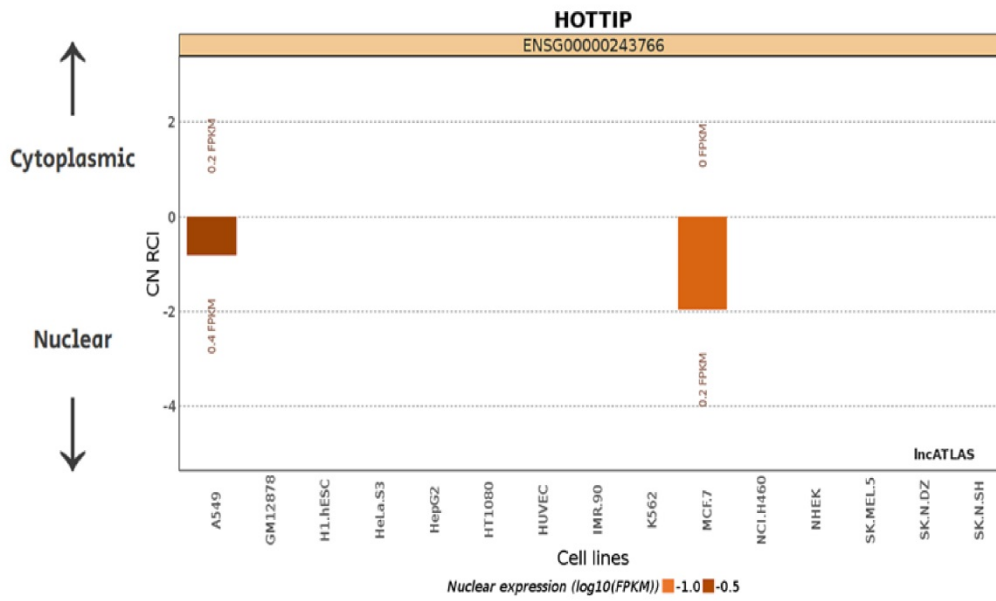

**Supplementary Figure 1.** HOTTIP was mainly located in the nucleus of RASFs predicted by the IncATLAS website.

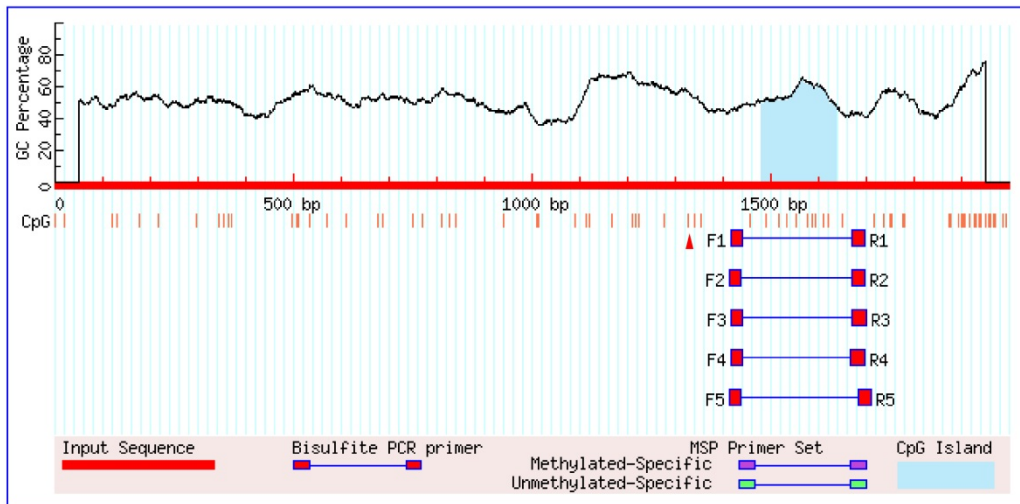

**Supplementary Figure 2.** The CpG islands in the promoter region of SFRP1 were analyzed by the Methprimer website.

| 序号 | StartInGenome | EndInGenome | MeanStability | MeanIdentity (%) | Score | TFO_sequence                                                                                 | TTS_sequence                                                                                    |
|----|---------------|-------------|---------------|------------------|-------|----------------------------------------------------------------------------------------------|-------------------------------------------------------------------------------------------------|
| 1  | 41310643      | 41310703    | 2.27          | 65.08            | 1.67  | TTTTGACCCCTATTATAATTT<br>CATCTTCAGTGTTTTATTAT<br>CCACTTCCTCTCTCTCTAT<br>CTT                  | CACTAGGGCAGACGCCAAG<br>AGGACGGTATCAGCACAAC<br>AGCTCGGCCCCAGGAAC<br>AGAAG                        |
| 2  | 41309649      | 41309702    | 1.89          | 62.96            | 1.44  | ATTATTTTTAAAAAGAATGA<br>ATAAAGATGTTCTGGTTTCT<br>TTTGTTTT                                     | CCTTCTTTTCTCCCTTG<br>TCTCTTTCTCCTCCCTT<br>TTTATTATGATTTTT                                       |
| 3  | 41309658      | 41309745    | 1.85          | 60.23            | 0.88  | CTAAAAATTACATATGAAAGA<br>GGAAGATTTATGTTACTTTTT<br>TATATGAGAGAATCGTCTT<br>TAATAGAAAATTTCTATTG | CGTCCGCCCTGGTCTCTC<br>TCCACCCACGCCGTGAT<br>CCATTCCCTCTTTTTCT<br>CCCTTGCTCTTTCTCC<br>TCCCTTTTATT |
| 4  | 41309650      | 41309701    | 2.08          | 64.15            | 1.55  | TCATCTTCTAAAAATTACAT<br>ATGAAAGAGGAAGATTATG<br>TTACTTTTTTAT                                  | CTTCTTTTCTCCCTTGT<br>CTCTTTCTCCTCCCTT<br>TTATTATGATTTTT                                         |
| 5  | 41311229      | 41311283    | 1.25          | 63.16            | 1.26  | CAAGGCCAGCTCCACATTC<br>TTCCCTCCCTCCCACTT<br>CACCGTAGCCCCGAACCC                               | ATCCCGATCTTGCTCTCTC<br>TTCTCTGTGTTTCTTCCA<br>GCCTCCATGCACCTT                                    |
| 6  | 41311134      | 41311196    | 1.1           | 63.64            | 1.36  | GAGTAGGGTCTAGGCCCC<br>TGTTCCTGGGACTTGAAG<br>GCGGTTTTACATACTGGTCA<br>GACACGGC                 | CAGACACGGTGATCCACG<br>GTGCACACAGGAGGCTTCT<br>GCAGATGGATGACTTCTCT<br>GTCATT                      |

**Supplementary Figure 3.** The binding sites of HOTTIP and SFRP1 were predicted by the website Long Target.

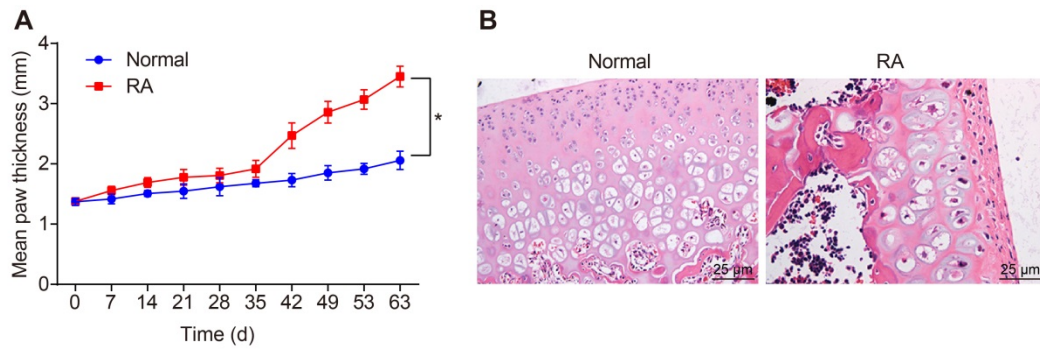

**Supplementary Figure 4.** The rat model of RA was identified using paw swelling scores of rats and pathological changes in the lesions induced after modeling. (A) The paw thickness of rats after modeling. (B) The pathological changes in the lesion after modeling detected by HE staining ( $\times 100$ ; scale bar = 200  $\mu\text{m}$ ). The normal group refers to rats without treatment. \*,  $p < 0.05$ . The results of paw thickness were expressed as mean  $\pm$  standard deviation. Comparisons among multiple groups were analyzed by one-way ANOVA.  $n = 15$ .
